# Supplementary material for: KAT6A, a novel regulator of β-catenin, promotes tumorigenicity and chemoresistance in ovarian cancer by acetylating COP1
Source: PubMed Central journal article supplement (PMC8120227; doi:10.7150/thno.57455), 2021-04-15
Supplement: thnov11p6278s1.pdf [file thnov11p6278s1.pdf]

**Supplementary Table 1 Top 20 of identified proteins associated with KAT6A**

| prot_acc | prot_acc_name | gene name | prot_cover (%) |
|----------|---------------|-----------|----------------|
| Q8NHY2   | COP1_HUMAN    | COP1      | 21             |
| P10809   | CH60_HUMAN    | HSPD1     | 20.1           |
| Q8NFW8   | NEUA_HUMAN    | CMAS      | 19.4           |
| Q5QNW6   | H2B2F_HUMAN   | HIST2H2BF | 19             |
| P42575   | CASP2_HUMAN   | CASP2     | 18.8           |
| Q6PJ69   | TRI65_HUMAN   | TRIM65    | 18.6           |
| Q9BTY7   | HGH1_HUMAN    | HGH1      | 17.9           |
| O95801   | TTC4_HUMAN    | TTC4      | 17.8           |
| Q13362   | 2A5G_HUMAN    | PPP2R5C   | 17.4           |
| Q5T2D3   | OTUD3_HUMAN   | OTUD3     | 17.3           |
| Q9UJU6   | DBNL_HUMAN    | DBNL      | 17.2           |
| Q8TBX8   | PI42C_HUMAN   | PIP4K2C   | 17.1           |
| P31939   | PUR9_HUMAN    | ATIC      | 17.1           |
| Q9BQG2   | NUD12_HUMAN   | NUDT12    | 16.9           |
| Q6Y288   | B3GLT_HUMAN   | B3GLCT    | 16.5           |
| Q9Y4P1   | ATG4B_HUMAN   | ATG4B     | 16.3           |
| Q86U42   | PABP2_HUMAN   | PABPN1    | 16.3           |
| P35659   | DEK_HUMAN     | DEK       | 15.7           |
| Q12874   | SF3A3_HUMAN   | SF3A3     | 15.6           |
| P0DOX5   | IGG1_HUMAN    | IGG1      | 15.4           |

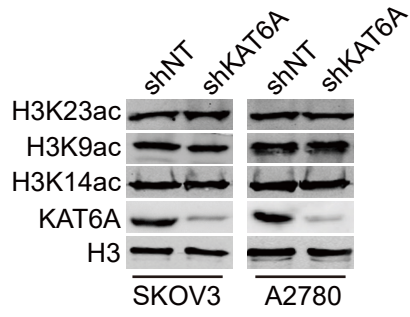

**Figure S1** Western blot analysis of the effects of *KAT6A* knockdown on the H3K23ac, H3K9ac, and H3K14ac protein levels in SKOV3 and A2780 cells.

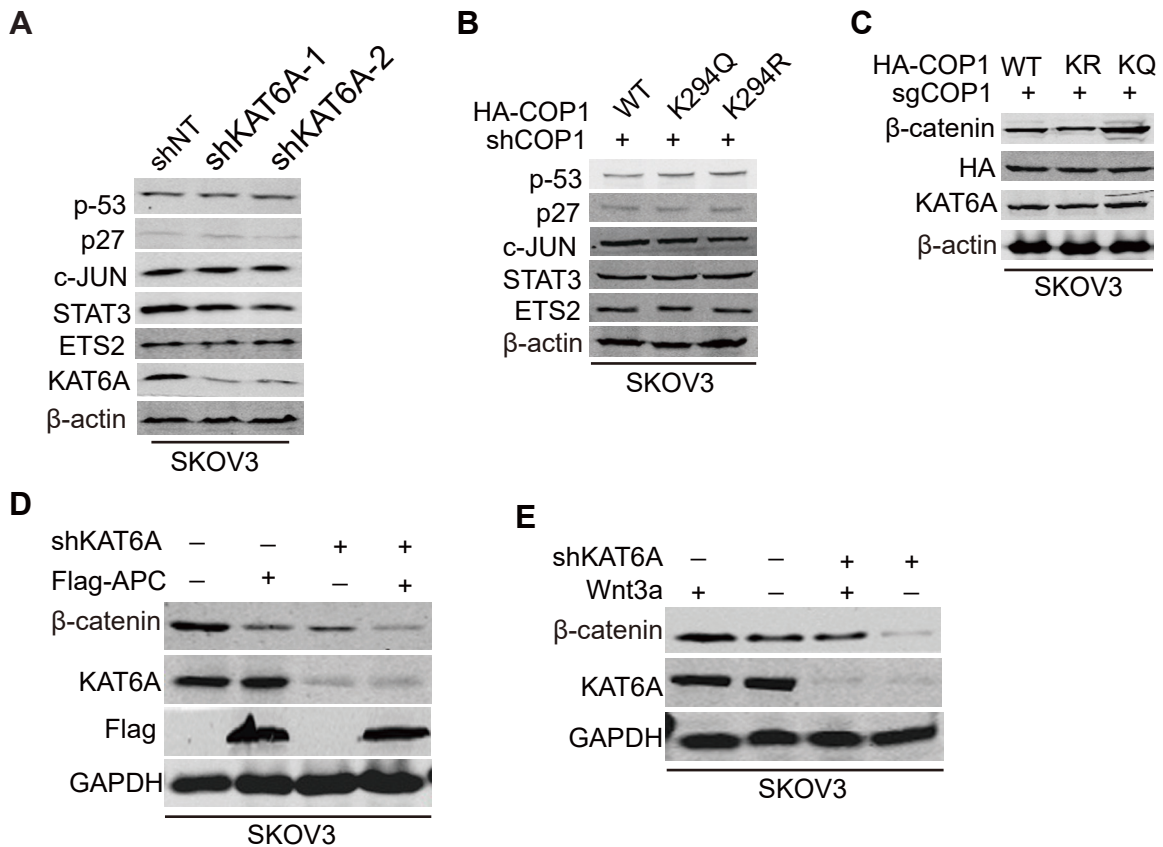

**Figure S2 Effects of *KAT6A* KD or COP1 acetylation on  $\beta$ -catenin-targeted downstream protein expression**

(A) WB of the effects of *KAT6A* KD on p53, p27, ETS2, c -JUN, and STAT3 protein levels. (B) WB of the effects of COP1 acetylation on p53, p27, ETS2, c -JUN, and STAT3 protein levels. (C) Effects of overexpression of shRNA-resistant COP1-WT or COP1-K294Q/K294R mutant on  $\beta$ -catenin protein levels. (D and E) WB analysis of the effects of *KAT6A* KO and APC or Wnt3a (100 ng/ml) on  $\beta$ -catenin protein levels.

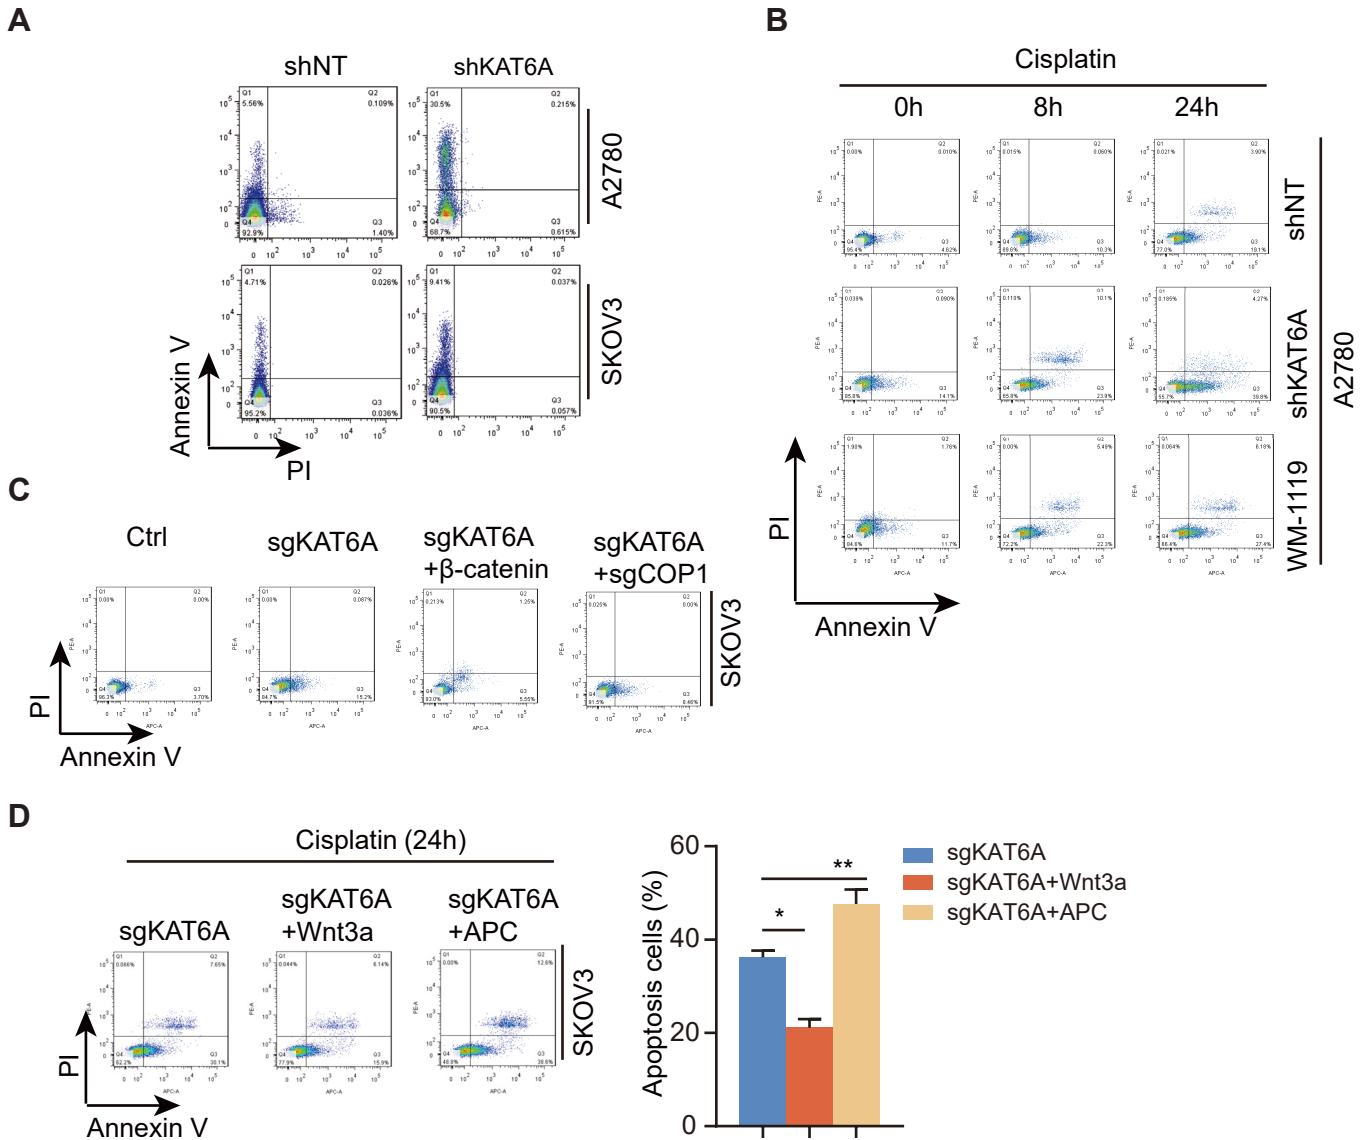

**Figure S3 Effects of KAT6A KD on apoptosis**

(A) Effects of *KAT6A* KD on apoptosis in SKOV3 and A2780 cells. (B) Representative images of apoptosis assays in Figure 6E. (C) Representative images of apoptosis assays in Figure 6G. (D) Representative images (left) and quantification (right) of apoptosis assays in KAT6A KO SKOV3 cells treated with cisplatin for 24 h with or without Wnt/APC. \* $P < 0.05$ , \*\* $P < 0.01$ .
